# Supplementary material
Source: PubMed Central journal article supplement (PMC5793876)
Supplement: NIHMS935812-supplement-supp_1.pdf [file NIHMS935812-supplement-supp_1.pdf]

Supporting Information for

Diabatic-At-Construction (DAC) Method for Diabatic and Adiabatic Ground  
and Excited States Based on Multistate Density Functional Theory

Adam Grofe,<sup>1,2</sup> Zexing Qu,<sup>1</sup> Donald G. Truhlar,<sup>2</sup> Hui Li,<sup>1</sup> and Jiali Gao<sup>1,2</sup>

1. Institute of Theoretical Chemistry, Jilin University  
Changchun Jilin Province 130023, China
2. Department of Chemistry and Supercomputing Institute, University of Minnesota,  
Minneapolis, Minnesota 55455, United States

## 1. Optimization of Block-Localized Kohn-Sham Orbitals

We partition a system consisting of  $N$  electrons and  $M$  basis functions into  $K$  blocks with  $n_A$  electrons and  $m_A$  basis functions in block  $A$ . The block-localized Kohn-Sham (BLKS) orbitals corresponding to a given charge and spin character,<sup>1-3</sup> are written in terms of the atomic orbitals located on atoms in the particular subspace:

$$|\psi_i^A\rangle = \chi_A \mathbf{C}_i^A = \sum_{\mu=1}^{m_A} |\chi_{A\mu}\rangle c_{\mu i}^A, \quad A=1, \dots, K \quad (\text{A1})$$

where  $c_{\mu i}^A$  is an element of the column coefficient vector  $(\mathbf{C}_i^A)$  of KS orbital  $i$  ( $|\psi_i^A\rangle$ ), and  $\{|\chi_{A\mu}\rangle\}_{\mu=1}^{m_A}$  are the basis functions in block  $A$ , arranged as a row vector  $\chi_A$ . Let  $\Omega^A = \psi_1^A \alpha \psi_1^A \beta \dots \psi_{n_A/2}^A \beta$  be a successive product of  $n_A$  occupied spin-orbitals in block  $A$ , and  $\alpha$  and  $\beta$  are spin functions. The Slater determinant function for the block-localized system is constructed as follows:

$$\Phi = \frac{1}{\sqrt{N!}} \hat{A}\{\Omega^1 \Omega^2 \dots \Omega^K\} \quad (\text{A2})$$

where  $\hat{A}$  is an antisymmetrization operator.

The overlap matrix of the MOs is given as follows

$$\mathbf{S} = \mathbf{C}^T \mathbf{R} \mathbf{C} \quad (\text{A3})$$

where  $\mathbf{R} = \chi^T \chi$  is the overlap in terms of the basis functions, and  $\mathbf{C}$  is the transformation matrix. The one-particle density matrix from the occupied nonorthogonal BLKS orbitals is

$$\mathbf{D} = \mathbf{C}(\mathbf{C}^T \mathbf{R} \mathbf{C})^{-1} \mathbf{C}^T \quad (\text{A4})$$

which satisfies the symmetry ( $\mathbf{D}^T = \mathbf{D}$ ), rank ( $\text{Tr}(\mathbf{D}\mathbf{R}) = N$ ) and idempotency ( $\mathbf{D}\mathbf{R}\mathbf{D} = \mathbf{D}$ ) conditions, and the electron density is given as follows

$$\rho(\mathbf{r}) = \sum_{\mu\nu}^m |\chi_\mu(\mathbf{r}) \rangle D_{\mu\nu} \langle \chi_\nu(\mathbf{r})| = \chi(\mathbf{r}) \mathbf{D} \chi^T(\mathbf{r}) \quad (\text{A5})$$

Using the one-particle density, we obtain the BLDFE energy as:<sup>1</sup>

$$E[\rho] = \text{Tr}(\mathbf{D}\mathbf{h}) + \frac{1}{2} \text{Tr}(\mathbf{D}\mathbf{J}\mathbf{D}) + E_{xc}[\rho(\mathbf{r})] + E_{nuc} \quad (\text{A6})$$

where  $E_{nuc}$  is the coulomb energy of the nuclei,  $\mathbf{h}$  and  $\mathbf{J}$  are the usual Hamiltonian (one-electron) and Coulomb integral matrices, and  $E_{xc}[\rho(\mathbf{r})]$  is the exchange-correlation energy functional.

The block-localized Kohn-Sham equations for the nonorthogonal KS orbitals can be derived.<sup>1,3-10</sup> Because the coefficient matrix is block-diagonal, the conventional SCF procedure for the Kohn-Sham equations of the entire system can be cast into  $K$  separate KS equations, one set for each subgroup. First, define a projection operator  $\hat{P}_{\notin A}$ , excluding orbitals in block  $A$ , indicated by the subscripts  $\notin A$ :

$$\hat{P}_{\notin A} = \sum_{B, C \neq A}^K \sum_{i, j}^{occ} |\psi_i^B \rangle [(\mathbf{S}_{\notin A})^{-1}]_{ij} \langle \psi_j^C | \quad (\text{A7})$$

where  $\mathbf{S}_{\notin A}$  is the overlap matrix without the occupied KS orbitals of block  $A$ . Then, the KS equations for the orbitals of block  $A$  are

$$\hat{F}^A |\psi_i^A \rangle = (\hat{1} - \hat{P}_{\notin A}) \hat{F} (\hat{1} - \hat{P}_{\notin A}) |\psi_i^A \rangle = (\hat{1} - \hat{P}_{\notin A}) |\psi_i^A \rangle \varepsilon_i^A \quad (\text{A8})$$

with  $\hat{F}$  being the unprojected (conventional) KS operator. In matrix form in terms of the basis functions, the generalized secular equations can be written as follows:<sup>3,9,10</sup>

$$\mathbf{F}_{AA}^P \mathbf{C}_{AA} = \mathbf{R}_{AA}^P \mathbf{C}_{AA} \boldsymbol{\varepsilon}_{AA} \quad (\text{A9})$$

where  $\boldsymbol{\varepsilon}_{AA}$  is a diagonal matrix corresponding to orbital energies, and the projected overlap ( $\mathbf{R}_{AA}^P$ ) and KS-Fock ( $\mathbf{F}_{AA}^P$ ) matrices are given as

$$\mathbf{R}_{AA}^P = (\mathbf{R}_{AA}, \mathbf{R}_{AB}) \mathbf{P}_{\notin A} \quad (\text{A10})$$

$$\mathbf{F}_{AA}^P = (\mathbf{P}_{\notin A})^T \mathbf{F} \mathbf{P}_{\notin A} \quad (\text{A11})$$

The projection matrix is defined by

$$\mathbf{P}_{\notin A} = \begin{pmatrix} \mathbf{1}_{AA} \\ -\mathbf{D}_{BB} \mathbf{R}_{BA} \end{pmatrix} \quad (\text{A12})$$

where the subscripts specifies the corresponding block matrices.

The computational procedure is conveniently described by considering an effective partition of two blocks,  $A$  and  $B$ , where the orbitals in  $A$  are being optimized. Starting from an initial guess, one iteratively optimizes the KS orbitals of each block employing the densities generated previously for other blocks until the total energy and density are converged.

(1) Cembran, A.; Song, L.; Mo, Y.; Gao, J. Block-localized density functional theory (BLDFT), diabatic coupling, and its use in valence bond theory for representing reactive potential energy surfaces. *J. Chem. Theory Comput.* **2009**, *5*, 2702-2716..

(2) Mo, Y.; Gao, J. Ab initio QM/MM simulations with a molecular orbital-valence bond (MOVB) method: application to an SN2 reaction in water. *J. Comput. Chem.* **2000**, *21*, 1458-1469.

(3) Mo, Y.; Gao, J. An Ab Initio Molecular Orbital-Valence Bond (MOVB) Method for Simulating Chemical Reactions in Solution. *J. Phys. Chem. A* **2000**, *104*, 3012-3020.

- (4) Stoll, H.; Wagenblast, G.; Preuss, H. On the use of local basis sets for localized molecular orbitals. *Theor. Chim. Acta* **1980**, *57*, 169-178.
- (5) Gianinetti, E.; Raimondi, M.; Tornaghi, E. Modification of the Roothaan equations to exclude BSSE from molecular interactions calculations. *Int. J. Quantum Chem.* **1996**, *60*, 157-166.
- (6) Gianinetti, E.; Vandoni, I.; Famulari, A.; Raimondi, M. Extension of the SCF-MI method to the case of K fragments one of which is an open-shell system. *Adv. Quantum Chem.* **1998**, *31*, 251-266.
- (7) Raimondi, M.; Famulari, A.; Specchio, R.; Sironi, M.; Moroni, F.; Gianinetti, E. Ab initio non-orthogonal approaches to the computation of weak interactions and of localized molecular orbitals for QM/MM procedures. *Theochem* **2001**, *573*, 25-42.
- (8) Mo, Y.; Zhang, Y.; Gao, J. A Simple Electrostatic Model for Trisilylamine: Theoretical Examinations of the n.fwdarw..sigma. Negative Hyperconjugation, p.pi..fwdarw.d.pi. Bonding, and Stereoelectronic Interaction. *J. Am. Chem. Soc.* **1999**, *121*, 5737-5742.
- (9) Nagata, T.; Takahashi, O.; Saito, K.; Iwata, S. Basis set superposition error free self-consistent field method for molecular interaction in multi-component systems: Projection operator formalism. *J. Chem. Phys.* **2001**, *115*, 3553-3560.
- (10) Khaliullin, R. Z.; Head-Gordon, M.; Bell, A. T. Theoretical Study of Solvent Effects on the Thermodynamics of Iron(III) [Tetrakis(pentafluorophenyl)]porphyrin Chloride Dissociation. *J. Phys. Chem. B* **2007**, *111*, 10992-10998.

## 2. Numerical data for Figure 1.

Relative energies (eV) of singlet states of LiH as a function of Li-H distance from MS-CASPT2/SA(4)-CASSCF/aug-cc-pVTZ calculations

| R(H-Li), Å | X(S0)    | A(S1)   | C(S2)   | D(S3)   |
|------------|----------|---------|---------|---------|
| 0.95252    | 0.90600  | 4.61993 | 7.09820 | 7.50061 |
| 1.05835    | -0.44458 | 3.40487 | 5.80424 | 6.22618 |
| 1.19065    | -1.49537 | 2.39233 | 4.73380 | 5.16477 |
| 1.32294    | -2.07747 | 1.75075 | 4.06676 | 4.49464 |
| 1.45524    | -2.35935 | 1.34709 | 3.66013 | 4.07724 |
| 1.58753    | -2.44945 | 1.09655 | 3.42135 | 3.82365 |
| 1.71983    | -2.41837 | 0.94502 | 3.28965 | 3.67621 |
| 1.85212    | -2.31265 | 0.85782 | 3.22472 | 3.59714 |
| 1.98441    | -2.16322 | 0.81221 | 3.19995 | 3.56156 |
| 2.11671    | -1.99037 | 0.79252 | 3.19809 | 3.55301 |
| 2.24900    | -1.80714 | 0.78782 | 3.20811 | 3.56066 |
| 2.38130    | -1.62177 | 0.79099 | 3.22296 | 3.57729 |
| 2.51359    | -1.43954 | 0.79822 | 3.23807 | 3.59825 |
| 2.64589    | -1.26396 | 0.80821 | 3.25039 | 3.62078 |
| 2.91047    | -0.94203 | 0.83774 | 3.25868 | 3.66674 |
| 3.17506    | -0.66937 | 0.88548 | 3.23612 | 3.71624 |
| 3.43965    | -0.45331 | 0.95551 | 3.18018 | 3.76872 |
| 3.70424    | -0.29537 | 1.03948 | 3.09602 | 3.78348 |
| 3.96883    | -0.18759 | 1.12445 | 2.98835 | 3.73239 |
| 4.23342    | -0.11742 | 1.22288 | 2.88905 | 3.68393 |
| 4.49801    | -0.07427 | 1.33414 | 2.82036 | 3.65792 |
| 4.76260    | -0.04863 | 1.44493 | 2.78062 | 3.64371 |
| 5.29177    | -0.02462 | 1.62693 | 2.76375 | 3.62525 |
| 5.82095    | -0.01605 | 1.73884 | 2.80198 | 3.60611 |
| 6.35013    | -0.01266 | 1.79598 | 2.87296 | 3.58421 |
| 7.93766    | -0.00924 | 1.83723 | 3.15986 | 3.57071 |
| 9.00000    | -0.00791 | 1.83999 | 3.27926 | 3.64115 |
| 10.58354   | -0.00499 | 1.84092 | 3.32893 | 3.75158 |
| 12.00000   | -0.00254 | 1.84116 | 3.33717 | 3.79180 |
| 15.87532   | -0.00100 | 1.84107 | 3.33981 | 3.80675 |

Relative energies (eV) as a function of Li-H distance from MSDFT/PBE0/aug-cc-pVTZ calculations.

| R(H-Li), Å | X(S0)   | A(S1)  | C(S2)  | D(S3)  |
|------------|---------|--------|--------|--------|
| 1.0000     | 0.6054  | 4.3469 | 6.9654 | 7.3609 |
| 1.1000     | -0.5210 | 3.3047 | 5.8501 | 6.2813 |
| 1.2000     | -1.2691 | 2.5628 | 5.0743 | 5.5136 |
| 1.3000     | -1.7437 | 2.0294 | 4.5453 | 4.9664 |
| 1.4000     | -2.0247 | 1.6447 | 4.1943 | 4.5792 |
| 1.5000     | -2.1707 | 1.3703 | 3.9686 | 4.3127 |

|         |         |        |        |        |
|---------|---------|--------|--------|--------|
| 1.6000  | -2.2227 | 1.1797 | 3.8283 | 4.1383 |
| 1.7000  | -2.2095 | 1.0462 | 3.7448 | 4.0352 |
| 1.8000  | -2.1520 | 0.9479 | 3.6968 | 3.9855 |
| 1.9000  | -2.0646 | 0.8723 | 3.6707 | 3.9722 |
| 2.0000  | -1.9575 | 0.8138 | 3.6590 | 3.9779 |
| 2.1250  | -1.8071 | 0.7609 | 3.6582 | 3.9865 |
| 2.2500  | -1.6478 | 0.7268 | 3.6674 | 3.9731 |
| 2.5000  | -1.3282 | 0.6992 | 3.6929 | 3.8526 |
| 2.6250  | -1.1753 | 0.6997 | 3.6809 | 3.7845 |
| 2.7500  | -1.0299 | 0.7072 | 3.6114 | 3.7678 |
| 2.8750  | -0.8932 | 0.7205 | 3.5228 | 3.7727 |
| 3.0000  | -0.7662 | 0.7389 | 3.4384 | 3.7779 |
| 3.1250  | -0.6495 | 0.7621 | 3.3569 | 3.7791 |
| 3.2500  | -0.5439 | 0.7901 | 3.2789 | 3.7746 |
| 3.3750  | -0.4502 | 0.8224 | 3.2047 | 3.7649 |
| 3.5000  | -0.3684 | 0.8591 | 3.1305 | 3.7511 |
| 3.7500  | -0.2396 | 0.9445 | 2.9825 | 3.7190 |
| 4.0000  | -0.1512 | 1.0419 | 2.8466 | 3.6899 |
| 4.5000  | -0.0573 | 1.2445 | 2.6477 | 3.6485 |
| 5.0000  | -0.0215 | 1.4158 | 2.5548 | 3.6206 |
| 6.0000  | -0.0036 | 1.5955 | 2.6138 | 3.5833 |
| 8.0000  | -0.0010 | 1.6481 | 3.0415 | 3.5419 |
| 10.0000 | -0.0009 | 1.6499 | 3.4025 | 3.5346 |
| 12.0000 | -0.0009 | 1.6499 | 3.4909 | 3.7022 |

### 3. Numerical data for Figure 2.

Relative energies (eV) of triplet states of LiH as a function of interatomic distance from MS-CASPT2/SA(4)-CASSCF/aug-cc-pVTZ calculations

| R(H-Li), Å | a(T1)  | c(T2)  | d(T3)  |
|------------|--------|--------|--------|
| 0.9525     | 4.3651 | 6.8277 | 7.4325 |
| 1.0584     | 3.1522 | 5.5363 | 6.1523 |
| 1.1906     | 2.1369 | 4.4698 | 5.0768 |
| 1.3229     | 1.4876 | 3.8112 | 4.3884 |
| 1.4552     | 1.0715 | 3.4131 | 3.9564 |
| 1.5875     | 0.8030 | 3.1812 | 3.6840 |
| 1.7198     | 0.6272 | 3.0557 | 3.5057 |
| 1.8521     | 0.5085 | 2.9966 | 3.3697 |
| 1.9844     | 0.4252 | 2.9802 | 3.2423 |
| 2.1167     | 0.3615 | 2.9579 | 3.1344 |
| 2.2490     | 0.3104 | 2.8722 | 3.1032 |
| 2.3813     | 0.2626 | 2.7408 | 3.1524 |
| 2.5136     | 0.2252 | 2.6184 | 3.1864 |
| 2.6459     | 0.1921 | 2.5119 | 3.2203 |
| 2.9105     | 0.1371 | 2.3378 | 3.2788 |
| 3.1751     | 0.0952 | 2.2096 | 3.3208 |
| 3.4397     | 0.0649 | 2.1177 | 3.3488 |
| 3.7042     | 0.0440 | 2.0529 | 3.3668 |
| 3.9688     | 0.0300 | 2.0081 | 3.3783 |
| 4.2334     | 0.0208 | 1.9775 | 3.3857 |

Relative energies (eV) of triplet states of LiH as a function of interatomic distance from MSDFT/PBE0/aug-cc-pVTZ calculations

| R(H-Li), Å | a(T1)  | C(T2)  | d(T3)  | e(T4)   |
|------------|--------|--------|--------|---------|
| 0.9000     | 5.4286 | 8.2744 | 8.8878 | 16.0053 |
| 1.0000     | 4.0009 | 6.6845 | 7.3672 | 14.0891 |
| 1.1000     | 3.0054 | 5.5511 | 6.3021 | 12.9002 |
| 1.2000     | 2.3122 | 4.7484 | 5.5496 | 12.2260 |
| 1.3000     | 1.8271 | 4.1858 | 5.0138 | 11.8210 |
| 1.4000     | 1.4808 | 3.7977 | 4.6308 | 11.3793 |
| 1.5000     | 1.2227 | 3.5404 | 4.3597 | 10.5653 |
| 1.6000     | 1.0214 | 3.3809 | 4.1698 | 9.2816  |
| 1.7000     | 0.8577 | 3.2945 | 4.0369 | 7.8236  |
| 1.8000     | 0.7196 | 3.2614 | 3.9382 | 6.5428  |
| 1.9000     | 0.6009 | 3.2651 | 3.8478 | 5.5738  |
| 2.0000     | 0.4998 | 3.2927 | 3.7305 | 4.9153  |
| 2.1250     | 0.3972 | 3.3432 | 3.4937 | 4.4727  |
| 2.2500     | 0.3181 | 3.1806 | 3.4138 | 4.3025  |



|         |         |        |        |        |
|---------|---------|--------|--------|--------|
| 2.5000  | 0.2108  | 2.6761 | 3.5311 | 4.1865 |
| 2.6250  | 0.1739  | 2.4968 | 3.5820 | 4.1377 |
| 2.7500  | 0.1442  | 2.3550 | 3.6260 | 4.0793 |
| 2.8750  | 0.1198  | 2.2414 | 3.6631 | 4.0135 |
| 3.0000  | 0.0995  | 2.1489 | 3.6933 | 3.9453 |
| 3.1250  | 0.0825  | 2.0722 | 3.7153 | 3.8793 |
| 3.2500  | 0.0681  | 2.0080 | 3.7214 | 3.8328 |
| 3.3750  | 0.0561  | 1.9535 | 3.7025 | 3.8249 |
| 3.5000  | 0.0461  | 1.9068 | 3.6736 | 3.8382 |
| 3.7500  | 0.0308  | 1.8328 | 3.6268 | 3.8777 |
| 4.0000  | 0.0202  | 1.7791 | 3.5976 | 3.9163 |
| 4.5000  | 0.0081  | 1.7134 | 3.5647 | 3.9736 |
| 5.0000  | 0.0028  | 1.6810 | 3.5448 | 3.9987 |
| 6.0000  | -0.0004 | 1.6577 | 3.5196 | 3.9764 |
| 8.0000  | -0.0009 | 1.6504 | 3.4976 | 3.8739 |
| 10.0000 | -0.0009 | 1.6499 | 3.4932 | 3.8321 |
| 12.0000 | -0.0009 | 1.6499 | 3.4928 | 3.8239 |

4. *Numerical data for Figure 3.*

Relative energies (eV) for the VDC states of singlet LiH as a function of interatomic distance from BL-KSDFT and MSDFT/PBE0/aug-cc-pVTZ calculations

| R(Å)    | ionic   | S(2s-1s) | S(3s-1s) | S(2p-1s) | S(3p-1s) |
|---------|---------|----------|----------|----------|----------|
| 0.9000  | 2.9153  | 3.4481   | 8.5053   | 3.8101   | 24.1895  |
| 1.0000  | 1.1326  | 1.6992   | 6.9184   | 2.3548   | 7.0829   |
| 1.1000  | -0.1028 | 0.4612   | 5.8274   | 1.3396   | 6.0092   |
| 1.2000  | -0.9336 | -0.3881  | 5.0995   | 0.6594   | 5.2506   |
| 1.3000  | -1.4695 | -0.9480  | 4.6354   | 0.2151   | 4.7163   |
| 1.4000  | -1.7931 | -1.2991  | 4.3626   | -0.0619  | 4.3425   |
| 1.5000  | -1.9650 | -1.5043  | 4.2115   | -0.2204  | 4.0837   |
| 1.6000  | -2.0292 | -1.6085  | 4.1323   | -0.2952  | 3.9080   |
| 1.7000  | -2.0171 | -1.6414  | 4.0828   | -0.3114  | 3.7923   |
| 1.8000  | -1.9507 | -1.6219  | 4.0228   | -0.2871  | 3.7200   |
| 1.9000  | -1.8454 | -1.5629  | 3.9218   | -0.2354  | 3.6788   |
| 2.0000  | -1.7122 | -1.4753  | 3.7723   | -0.1651  | 3.6598   |
| 2.1250  | -1.5182 | -1.3406  | 3.5380   | -0.0609  | 3.6572   |
| 2.2500  | -1.3043 | -1.1927  | 3.2980   | 0.0538   | 3.6690   |
| 2.5000  | -0.8495 | -0.8973  | 2.9421   | 0.2943   | 3.7112   |
| 2.6250  | -0.6209 | -0.7606  | 2.8464   | 0.4137   | 3.7334   |
| 2.7500  | -0.3974 | -0.6351  | 2.8014   | 0.5298   | 3.7532   |
| 2.8750  | -0.1822 | -0.5228  | 2.7991   | 0.6411   | 3.7690   |
| 3.0000  | 0.0229  | -0.4250  | 2.8308   | 0.7464   | 3.7804   |
| 3.1250  | 0.2168  | -0.3417  | 2.8896   | 0.8451   | 3.7868   |
| 3.2500  | 0.3991  | -0.2729  | 2.9605   | 0.9368   | 3.7884   |
| 3.3750  | 0.5701  | -0.2172  | 3.0266   | 1.0212   | 3.7857   |
| 3.5000  | 0.7301  | -0.1726  | 3.0839   | 1.0984   | 3.7791   |
| 3.7500  | 1.0198  | -0.1082  | 3.1703   | 1.2315   | 3.8196   |
| 4.0000  | 1.2741  | -0.0672  | 3.2277   | 1.3383   | 3.7267   |
| 4.5000  | 1.6972  | -0.0252  | 3.3001   | 1.4859   | 3.6643   |
| 5.0000  | 2.0339  | -0.0090  | 3.3503   | 1.5686   | 3.6216   |
| 6.0000  | 2.5345  | -0.0009  | 3.4226   | 1.6324   | 3.6186   |
| 8.0000  | 3.1501  | 0.0001   | 3.4836   | 1.6494   | 3.7405   |
| 10.0000 | 3.5145  | 0.0001   | 3.4923   | 1.6499   | 3.8076   |
| 12.0000 | 3.7560  | 0.0002   | 3.4928   | 1.6499   | 3.8214   |

5. *Numerical data for Figure 4.*

Relative energies (eV) for the Gram-Schmidt orthogonalized DAC diabatic states of singlet LiH as a function of interatomic distance from BL-KSDFT and MSDFT/PBE0/aug-cc-pVTZ calculations.

4(a) direct GS orthogonalization.

| R(Å)    | ionic   | 2s     | 3s     | 2p      | 3p     |
|---------|---------|--------|--------|---------|--------|
| 1.0000  | 1.1325  | 8.1718 | 7.3783 | 22.8611 | 7.3075 |
| 1.1000  | -0.1028 | 7.7089 | 6.3405 | 22.1642 | 6.1745 |
| 1.2000  | -0.9336 | 7.5581 | 5.6556 | 22.3628 | 5.3570 |
| 1.3000  | -1.4696 | 7.4727 | 5.1968 | 23.1411 | 4.8038 |
| 1.4000  | -1.7929 | 7.2281 | 4.8466 | 23.9103 | 4.4781 |
| 1.5000  | -1.9649 | 6.6849 | 4.5383 | 23.8431 | 4.3040 |
| 1.6000  | -2.0291 | 5.8651 | 4.2702 | 22.3993 | 4.1690 |
| 1.7000  | -2.0171 | 4.9307 | 4.0871 | 19.8191 | 4.0153 |
| 1.8000  | -1.9507 | 4.0594 | 4.0126 | 16.8567 | 3.8689 |
| 1.9000  | -1.8454 | 3.3508 | 4.0245 | 14.1261 | 3.7652 |
| 2.0000  | -1.7121 | 2.8204 | 4.0879 | 11.8738 | 3.7075 |
| 2.1250  | -1.5181 | 2.3581 | 4.1919 | 9.7326  | 3.6825 |
| 2.2500  | -1.3042 | 2.0414 | 4.2833 | 8.1796  | 3.6906 |
| 2.5000  | -0.8495 | 1.6153 | 4.3233 | 6.1464  | 3.7687 |
| 2.6250  | -0.6209 | 1.4487 | 4.2645 | 5.4379  | 3.8229 |
| 2.7500  | -0.3975 | 1.2983 | 4.1745 | 4.8558  | 3.8760 |
| 2.8750  | -0.1823 | 1.1595 | 4.0762 | 4.3736  | 3.9219 |
| 3.0000  | 0.0229  | 1.0310 | 3.9862 | 3.9750  | 3.9589 |
| 3.1250  | 0.2169  | 0.9124 | 3.9034 | 3.6539  | 3.9883 |
| 3.2500  | 0.3992  | 0.8046 | 3.8365 | 3.3930  | 4.0128 |
| 3.3750  | 0.5701  | 0.7083 | 3.7935 | 3.1723  | 4.0357 |
| 3.5000  | 0.7301  | 0.6221 | 3.7655 | 2.9856  | 4.0575 |
| 3.7500  | 1.0199  | 0.4770 | 3.7355 | 2.6893  | 4.1002 |
| 4.0000  | 1.2740  | 0.3627 | 3.7230 | 2.4656  | 4.1404 |
| 4.5000  | 1.6972  | 0.2044 | 3.7119 | 2.1538  | 4.2060 |
| 5.0000  | 2.0340  | 0.1116 | 3.6955 | 1.9570  | 4.2425 |
| 6.0000  | 2.5345  | 0.0302 | 3.6392 | 1.7568  | 4.2213 |
| 8.0000  | 3.1500  | 0.0017 | 3.5350 | 1.6596  | 4.0166 |
| 10.0000 | 3.5143  | 0.0000 | 3.4994 | 1.6506  | 3.8795 |
| 12.0000 | 3.7560  | 0.0000 | 3.4934 | 1.6501  | 3.8335 |

4(b) an equal mixture of 2s and 2p states of Li,  $\Psi'_{2s} = N_b(\Psi_{2s} + \Psi_{2p})$  and  $\Psi'_{2p} = N_b(\Psi_{2p} - \Psi_{2s})$ , where  $N_b$  is a normalization factor.

| R(Å)    | ionic   | 2s     | 3s     | 2p      | 3p     |
|---------|---------|--------|--------|---------|--------|
| 1.0000  | 1.1325  | 4.4471 | 7.1854 | 26.7786 | 7.3075 |
| 1.1000  | -0.1028 | 3.4588 | 6.0800 | 26.6750 | 6.1745 |
| 1.2000  | -0.9336 | 2.7608 | 5.3217 | 27.4940 | 5.3570 |
| 1.3000  | -1.4696 | 2.2585 | 4.8117 | 28.7403 | 4.8038 |
| 1.4000  | -1.7929 | 1.8863 | 4.4768 | 29.6219 | 4.4781 |
| 1.5000  | -1.9649 | 1.6008 | 4.2623 | 29.2031 | 4.3040 |
| 1.6000  | -2.0291 | 1.3755 | 4.1287 | 27.0301 | 4.1690 |
| 1.7000  | -2.0171 | 1.1946 | 4.0504 | 23.5917 | 4.0153 |
| 1.8000  | -1.9507 | 1.0495 | 4.0104 | 19.8684 | 3.8689 |
| 1.9000  | -1.8454 | 0.9361 | 3.9938 | 16.5718 | 3.7652 |
| 2.0000  | -1.7121 | 0.8504 | 3.9867 | 13.9454 | 3.7075 |
| 2.1250  | -1.5181 | 0.7761 | 3.9696 | 11.5372 | 3.6825 |
| 2.2500  | -1.3042 | 0.7298 | 3.9247 | 9.8496  | 3.6906 |
| 2.5000  | -0.8495 | 0.6868 | 3.7396 | 7.6583  | 3.7687 |
| 2.6250  | -0.6209 | 0.6776 | 3.6281 | 6.8458  | 3.8229 |
| 2.7500  | -0.3975 | 0.6721 | 3.5298 | 6.1263  | 3.8760 |
| 2.8750  | -0.1823 | 0.6691 | 3.4610 | 5.4790  | 3.9219 |
| 3.0000  | 0.0229  | 0.6683 | 3.4262 | 4.8977  | 3.9589 |
| 3.1250  | 0.2169  | 0.6694 | 3.4158 | 4.3845  | 3.9883 |
| 3.2500  | 0.3992  | 0.6732 | 3.4234 | 3.9372  | 4.0128 |
| 3.3750  | 0.5701  | 0.6797 | 3.4455 | 3.5489  | 4.0357 |
| 3.5000  | 0.7301  | 0.6882 | 3.4727 | 3.2125  | 4.0575 |
| 3.7500  | 1.0199  | 0.7089 | 3.5274 | 2.6656  | 4.1002 |
| 4.0000  | 1.2740  | 0.7314 | 3.5745 | 2.2455  | 4.1404 |
| 4.5000  | 1.6972  | 0.7709 | 3.6389 | 1.6602  | 4.2060 |
| 5.0000  | 2.0340  | 0.7973 | 3.6632 | 1.3040  | 4.2425 |
| 6.0000  | 2.5345  | 0.8199 | 3.6346 | 0.9717  | 4.2213 |
| 8.0000  | 3.1500  | 0.8256 | 3.5350 | 0.8357  | 4.0166 |
| 10.0000 | 3.5143  | 0.8251 | 3.4994 | 0.8256  | 3.8795 |
| 12.0000 | 3.7560  | 0.8251 | 3.4934 | 0.8251  | 3.8335 |

4(c) the same  $sp$ -mixing as in (b) scaled by the overlap integral,  
 $\Psi'_{2s} = N_c(\Psi_{2s} + S_{2s2p}\Psi_{2p})$  and  $\Psi'_{2p} = N_c(\Psi_{2p} - S_{2s2p}\Psi_{2s})$ .

| R(Å)    | ionic   | 2s     | 3s     | 2p      | 3p     |
|---------|---------|--------|--------|---------|--------|
| 1.0000  | 1.1325  | 4.5108 | 7.2052 | 26.6948 | 7.3075 |
| 1.1000  | -0.1028 | 3.5187 | 6.1010 | 26.5941 | 6.1745 |
| 1.2000  | -0.9336 | 2.8128 | 5.3413 | 27.4224 | 5.3570 |
| 1.3000  | -1.4696 | 2.3002 | 4.8286 | 28.6820 | 4.8038 |
| 1.4000  | -1.7929 | 1.9176 | 4.4898 | 29.5776 | 4.4781 |
| 1.5000  | -1.9649 | 1.6237 | 4.2716 | 29.1710 | 4.3040 |
| 1.6000  | -2.0291 | 1.3913 | 4.1339 | 27.0091 | 4.1690 |
| 1.7000  | -2.0171 | 1.2041 | 4.0512 | 23.5816 | 4.0153 |
| 1.8000  | -1.9507 | 1.0542 | 4.0066 | 19.8676 | 3.8689 |
| 1.9000  | -1.8454 | 0.9377 | 3.9878 | 16.5759 | 3.7652 |
| 2.0000  | -1.7121 | 0.8525 | 3.9840 | 13.9457 | 3.7075 |
| 2.1250  | -1.5181 | 0.7840 | 3.9845 | 11.5144 | 3.6825 |
| 2.2500  | -1.3042 | 0.7464 | 3.9766 | 9.7810  | 3.6906 |
| 2.5000  | -0.8495 | 0.7151 | 3.9100 | 7.4599  | 3.7687 |
| 2.6250  | -0.6209 | 0.7023 | 3.8596 | 6.5892  | 3.8229 |
| 2.7500  | -0.3975 | 0.6844 | 3.8101 | 5.8338  | 3.8760 |
| 2.8750  | -0.1823 | 0.6588 | 3.7704 | 5.1802  | 3.9219 |
| 3.0000  | 0.0229  | 0.6256 | 3.7423 | 4.6243  | 3.9589 |
| 3.1250  | 0.2169  | 0.5859 | 3.7168 | 4.1671  | 3.9883 |
| 3.2500  | 0.3992  | 0.5423 | 3.6958 | 3.7957  | 4.0128 |
| 3.3750  | 0.5701  | 0.4974 | 3.6871 | 3.4893  | 4.0357 |
| 3.5000  | 0.7301  | 0.4528 | 3.6847 | 3.2360  | 4.0575 |
| 3.7500  | 1.0199  | 0.3685 | 3.6871 | 2.8463  | 4.1002 |
| 4.0000  | 1.2740  | 0.2936 | 3.6934 | 2.5644  | 4.1404 |
| 4.5000  | 1.6972  | 0.1774 | 3.7007 | 2.1921  | 4.2060 |
| 5.0000  | 2.0340  | 0.1015 | 3.6917 | 1.9712  | 4.2425 |
| 6.0000  | 2.5345  | 0.0291 | 3.6387 | 1.7581  | 4.2213 |
| 8.0000  | 3.1500  | 0.0017 | 3.5350 | 1.6596  | 4.0166 |
| 10.0000 | 3.5143  | 0.0000 | 3.4994 | 1.6506  | 3.8795 |
| 12.0000 | 3.7560  | 0.0000 | 3.4934 | 1.6501  | 3.8335 |

4.(d) the inclusion of a small amount (25%) of the 2s-covalent state (also overlap-dependent) in the ionic configuration,  $\Psi'_{2s} = N_c(\Psi_{2s} + S_{2s2p}\Psi_{2p})$

$\Psi'_{2p} = N_c(\Psi_{2p} - S_{2s2p}\Psi_{2s})$ , and  $\Psi'_{\text{ion}} = N_d(\Psi_{\text{ion}} + 0.25S_{2s2p}\Psi_{2s})$ .

| R(Å)    | ionic   | 2s     | 3s     | 2p      | 3p     |
|---------|---------|--------|--------|---------|--------|
| 1.0000  | 1.3342  | 4.6202 | 7.2188 | 26.3705 | 7.3075 |
| 1.1000  | 0.0879  | 3.6196 | 6.1173 | 26.2861 | 6.1745 |
| 1.2000  | -0.7573 | 2.9056 | 5.3592 | 27.1354 | 5.3570 |
| 1.3000  | -1.3086 | 2.3826 | 4.8463 | 28.4208 | 4.8038 |
| 1.4000  | -1.6435 | 1.9870 | 4.5051 | 29.3435 | 4.4781 |
| 1.5000  | -1.8185 | 1.6762 | 4.2830 | 28.9607 | 4.3040 |
| 1.6000  | -1.8759 | 1.4240 | 4.1407 | 26.8162 | 4.1690 |
| 1.7000  | -1.8484 | 1.2147 | 4.0536 | 23.3996 | 4.0153 |
| 1.8000  | -1.7622 | 1.0417 | 4.0063 | 19.6921 | 3.8689 |
| 1.9000  | -1.6375 | 0.9026 | 3.9875 | 16.4036 | 3.7652 |
| 2.0000  | -1.4882 | 0.7970 | 3.9867 | 13.7745 | 3.7075 |
| 2.1250  | -1.2805 | 0.7075 | 3.9957 | 11.3421 | 3.6825 |
| 2.2500  | -1.0596 | 0.6534 | 3.9984 | 9.6074  | 3.6906 |
| 2.5000  | -0.6024 | 0.5954 | 3.9494 | 7.2928  | 3.7687 |
| 2.6250  | -0.3769 | 0.5717 | 3.9023 | 6.4332  | 3.8229 |
| 2.7500  | -0.1594 | 0.5448 | 3.8520 | 5.6936  | 3.8760 |
| 2.8750  | 0.0474  | 0.5135 | 3.8082 | 5.0583  | 3.9219 |
| 3.0000  | 0.2408  | 0.4784 | 3.7742 | 4.5217  | 3.9589 |
| 3.1250  | 0.4210  | 0.4406 | 3.7421 | 4.0828  | 3.9883 |
| 3.2500  | 0.5878  | 0.4022 | 3.7154 | 3.7277  | 4.0128 |
| 3.3750  | 0.7423  | 0.3652 | 3.7023 | 3.4343  | 4.0357 |
| 3.5000  | 0.8855  | 0.3301 | 3.6961 | 3.1916  | 4.0575 |
| 3.7500  | 1.1434  | 0.2664 | 3.6942 | 2.8177  | 4.1002 |
| 4.0000  | 1.3701  | 0.2117 | 3.6977 | 2.5459  | 4.1404 |
| 4.5000  | 1.7524  | 0.1282 | 3.7023 | 2.1845  | 4.2060 |
| 5.0000  | 2.0642  | 0.0735 | 3.6923 | 1.9682  | 4.2425 |
| 6.0000  | 2.5429  | 0.0212 | 3.6389 | 1.7578  | 4.2213 |
| 8.0000  | 3.1505  | 0.0011 | 3.5350 | 1.6596  | 4.0166 |
| 10.0000 | 3.5146  | 0.0000 | 3.4994 | 1.6506  | 3.8795 |
| 12.0000 | 3.7560  | 0.0000 | 3.4934 | 1.6501  | 3.8335 |

6. *Numerical data for Figure 5.*

Selected computed diabatic coupling (eV) for the Gram-Schmidt orthogonalized DAC diabatic states in 4(d) above as a function of interatomic distance from MSDFT/PBE0/aug-cc-pVTZ calculations.

| R(A)  | ionic-2s | ionic-3s | ionic-2p | ionic-3p | 2s-3s    | 2p-3p    | 2s-2p    | 3s-3p    |
|-------|----------|----------|----------|----------|----------|----------|----------|----------|
| 1.000 | 0.000093 | 0.016323 | 14.17469 | 0.303449 | 0.448542 | 3.246486 | 1.879847 | 0.004553 |
| 1.100 | 0.000796 | 0.016837 | 11.94907 | 0.202685 | 0.492659 | 1.925263 | 2.073902 | 0.012261 |
| 1.200 | 0.002213 | 0.012799 | 10.30408 | 0.112665 | 0.491257 | 0.548205 | 2.216272 | 0.026991 |
| 1.300 | 0.003550 | 0.008089 | 9.020544 | 0.048052 | 0.447702 | 0.018131 | 2.195879 | 0.049512 |
| 1.400 | 0.006631 | 0.005401 | 7.992775 | 0.012659 | 0.370254 | 1.230299 | 1.957237 | 0.073589 |
| 1.500 | 0.015265 | 0.005617 | 7.173206 | 0.000848 | 0.280057 | 3.475228 | 1.534722 | 0.085554 |
| 1.600 | 0.035501 | 0.009746 | 6.508464 | 0.000449 | 0.189226 | 4.378597 | 1.068513 | 0.075813 |
| 1.700 | 0.073148 | 0.020005 | 5.924725 | 0.001407 | 0.108346 | 3.271027 | 0.702744 | 0.052019 |
| 1.800 | 0.129398 | 0.038199 | 5.369223 | 0.000868 | 0.047229 | 1.723133 | 0.485310 | 0.029252 |
| 1.900 | 0.198906 | 0.064084 | 4.833695 | 0.000112 | 0.010979 | 0.761137 | 0.386853 | 0.014007 |
| 2.000 | 0.272869 | 0.095887 | 4.339451 | 0.000079 | 0.000012 | 0.344089 | 0.364101 | 0.005324 |
| 2.125 | 0.360906 | 0.140657 | 3.813800 | 0.000745 | 0.015601 | 0.182562 | 0.394623 | 0.000464 |
| 2.250 | 0.439079 | 0.185844 | 3.400060 | 0.001494 | 0.050018 | 0.167272 | 0.450846 | 0.000935 |
| 2.500 | 0.568303 | 0.244530 | 2.827555 | 0.002617 | 0.118798 | 0.270990 | 0.515988 | 0.018931 |
| 2.625 | 0.620259 | 0.243639 | 2.617478 | 0.003215 | 0.139086 | 0.323038 | 0.494132 | 0.033136 |
| 2.750 | 0.661454 | 0.221794 | 2.432171 | 0.003916 | 0.148446 | 0.345791 | 0.439901 | 0.045701 |
| 2.875 | 0.689158 | 0.185541 | 2.259324 | 0.004609 | 0.148071 | 0.338067 | 0.367544 | 0.054143 |
| 3.000 | 0.701613 | 0.143890 | 2.091743 | 0.005101 | 0.139409 | 0.310619 | 0.291517 | 0.058296 |
| 3.125 | 0.698570 | 0.105526 | 1.926094 | 0.005142 | 0.123833 | 0.276950 | 0.222437 | 0.058968 |
| 3.250 | 0.681630 | 0.073769 | 1.763862 | 0.004672 | 0.105393 | 0.245192 | 0.165414 | 0.058399 |
| 3.375 | 0.653722 | 0.048276 | 1.608745 | 0.003819 | 0.088378 | 0.218108 | 0.120768 | 0.058776 |
| 3.500 | 0.617884 | 0.029299 | 1.462106 | 0.002729 | 0.073528 | 0.195761 | 0.086862 | 0.060034 |
| 3.750 | 0.533531 | 0.007363 | 1.198638 | 0.000664 | 0.050724 | 0.161537 | 0.043084 | 0.064536 |
| 4.000 | 0.445381 | 0.000202 | 0.976240 | 0.000068 | 0.035170 | 0.135330 | 0.020010 | 0.070312 |
| 4.500 | 0.289635 | 0.009162 | 0.638857 | 0.007683 | 0.016689 | 0.092634 | 0.003141 | 0.079443 |
| 5.000 | 0.176413 | 0.027917 | 0.410255 | 0.027781 | 0.007509 | 0.057961 | 0.000150 | 0.079349 |
| 6.000 | 0.056561 | 0.049038 | 0.157866 | 0.076477 | 0.001268 | 0.015899 | 0.000221 | 0.053815 |
| 8.000 | 0.003507 | 0.025993 | 0.017171 | 0.080155 | 0.000017 | 0.000179 | 0.000059 | 0.007559 |
| 10.00 | 0.000120 | 0.005353 | 0.001222 | 0.031950 | 0.000000 | 0.000081 | 0.000002 | 0.000339 |
| 12.00 | 0.000002 | 0.000624 | 0.000060 | 0.007434 | 0.000000 | 0.000140 | 0.000000 | 0.000006 |
